# Supplementary material for: Optimising the measurement of blood glucose and cholesterol in patients who had an acute stroke: a quality improvement project
Source: HighWire-hosted journal article supplement (doi:10.1136/bmjoq-2020-001237), 2021-06-01
Supplement: bmjoq-2020-001237supp002_data_supplement.pdf [file bmjoq-2020-001237supp002_data_supplement.pdf]

**Survey on Stroke Clerking Proforma***Please circle as appropriate***Have you been involved in Stroke Calls as a part of your job?**

Yes/No

**Do you use the current Stroke Clerking Proforma?**

Yes/No

**How would you rate the proforma on a scale of 1 (Poor) to 5 (Excellent)**

|                                                 |   |   |   |   |   |
|-------------------------------------------------|---|---|---|---|---|
| Content (i.e. clinical relevance of sections)   | 1 | 2 | 3 | 4 | 5 |
| Layout of sections                              | 1 | 2 | 3 | 4 | 5 |
| Design (i.e. font and space)                    | 1 | 2 | 3 | 4 | 5 |
| User friendliness (i.e. ease of use/navigation) | 1 | 2 | 3 | 4 | 5 |
| Conciseness                                     | 1 | 2 | 3 | 4 | 5 |

**Any specific comments on the aforementioned aspects?****Do you feel any improvements are required in the following sections?**

|                |     |    |
|----------------|-----|----|
| History        | Yes | No |
| Examination    | Yes | No |
| Investigations | Yes | No |
| Plan           | Yes | No |

**Please expand on what improvement(s) you feel would be beneficial?****Is it clear from the current proforma which blood tests are necessary to request for stroke patients?**

Yes/No

**Do you routinely request the following blood tests during a stroke call?**

|               |     |    |
|---------------|-----|----|
| Serum Glucose | Yes | No |
| Lipid Profile | Yes | No |

**Are you involved in the Stroke Team First Review?**

Yes/No

**If yes, would you prefer the Stroke Team First Review to be combined with the clerking proforma?**

Yes/No
